# Supplementary material for: Extracellular matrices derived from different cell sources and their effect on macrophage behavior and wound healing
Source: Royal Society of Chemistry journal article supplement (doi:10.1039/d0tb01885f), 2020-01-01
Supplement: d0tb01885f1.pdf [file d0tb01885f1.pdf]

## SUPPORTING INFORMATION

### **Extracellular matrices derived from different cell sources and their effect on macrophages behavior and wound healing**

Cininta Savitri<sup>a,b,‡</sup>, Sang Su Ha<sup>a,b,‡</sup>, Emily Liao<sup>c</sup>, Ping Du<sup>d,\*</sup> and Kwideok Park<sup>a,b,\*</sup>

<sup>a</sup> Center for Biomaterials, Korea Institute of Science and Technology (KIST), Seoul 02792, Republic of Korea

<sup>b</sup> Division of Bio-Medical Science and Technology, KIST School, University of Science and Technology (UST), Seoul 02792, Republic of Korea

<sup>c</sup> Tufts University School of Medicine, Boston, Massachusetts 02111, USA

<sup>d</sup> Center for Human Tissues & Organs Degeneration, Shenzhen Institute of Advanced Technology, Chinese Academy of Sciences, Shenzhen, Guangdong 518055, China

Running title: Cell-derived ECM and their effect on macrophage behavior

Submitted to *Journal of Material Chemistry B*

\*Correspondence:

Kwideok Park, Ph.D.

E-mail: kpark@kist.re.kr

Tel: +82-2-958-5288

Fax: +82-2-958-5308

Ping Du, Ph.D.

E-mail: ping.du@siat.ac.cn

August 2020

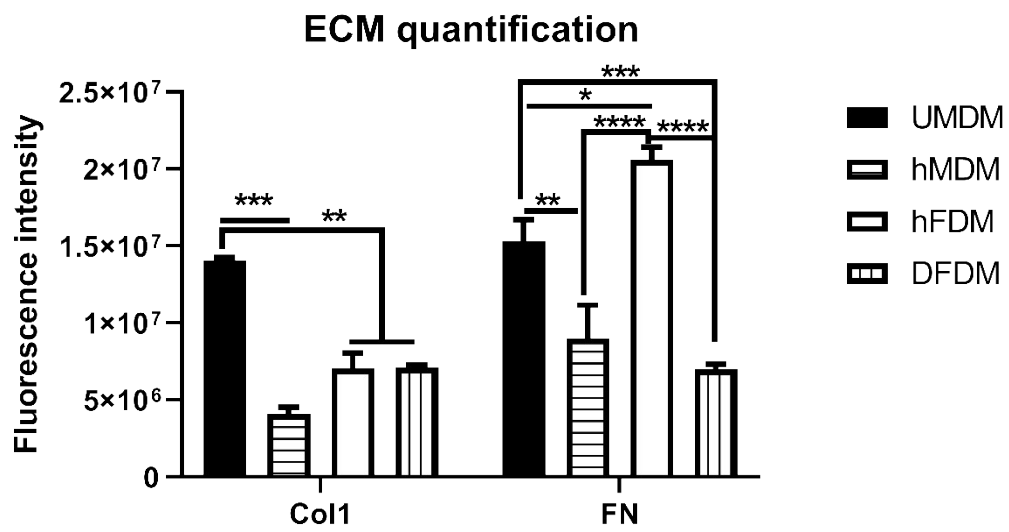

**Figure S1. Immunofluorescence quantification of collagen 1 and fibronectin from four different types of ECM.** UMDM showed the highest expression of Col1, while hFDM showed the highest expression of FN.

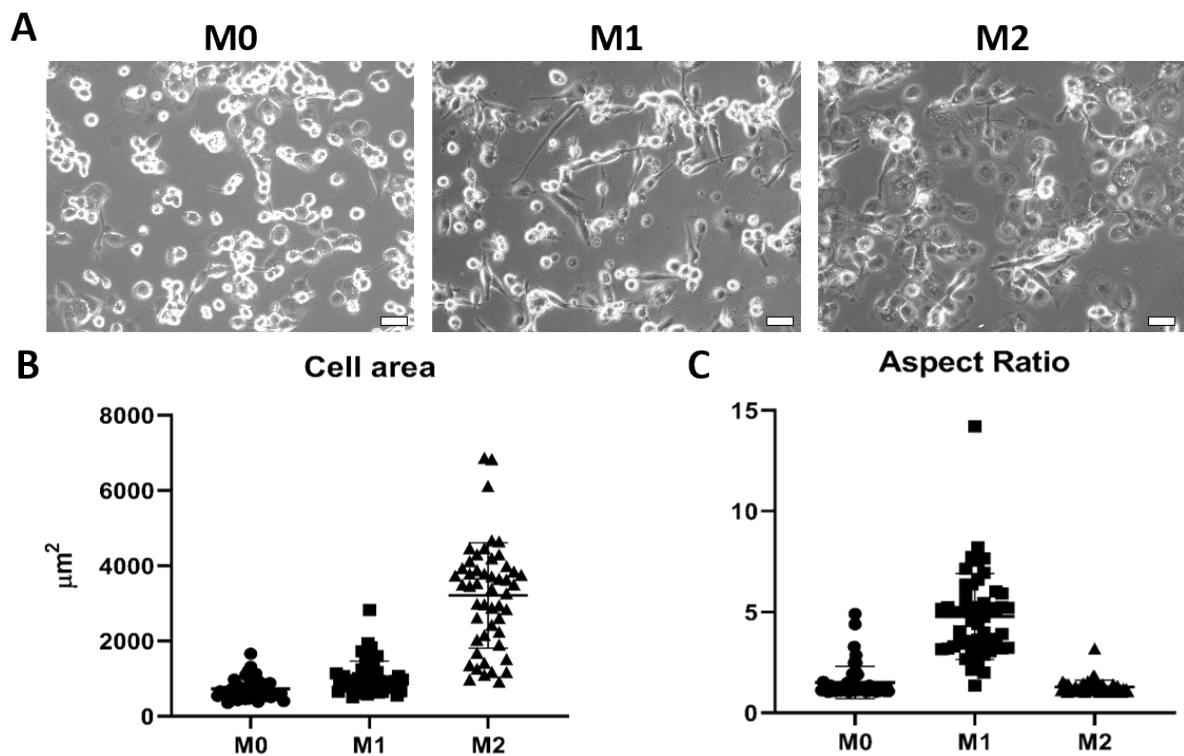

**Figure S2. Morphological observation of macrophage phenotypes.** (A) Representative images of macrophage phenotypes that are chemically induced by known protocols. Scale bar is 50 μm; (B) Comparison of cell area of each macrophage phenotype. Cell area of M2 phenotype is much larger than the others; (C) Comparison of cell aspect ratio of each macrophage phenotype.

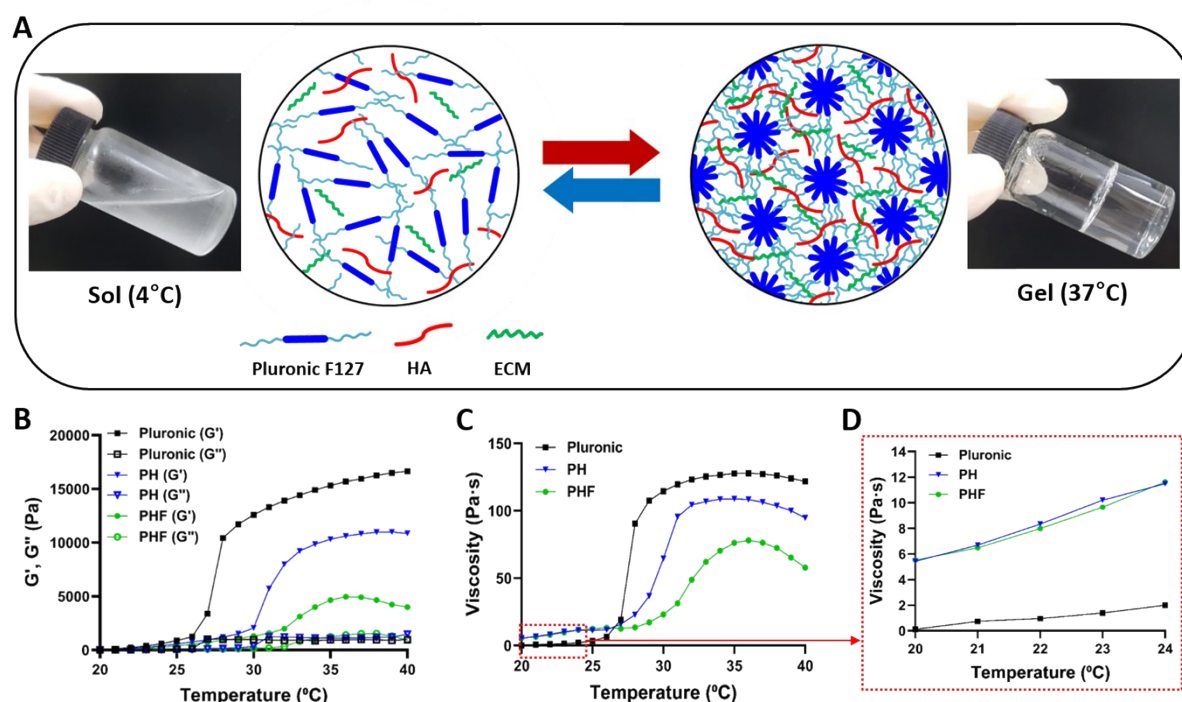

**Figure S3. Characterization of the ECM hydrogels.** (A) The appearance and schematic images of the ECM hydrogel in the solution (4°C) or gelation (37°C) state, respectively. (B) Rheological measurement for  $G'$  &  $G''$  and (C) Viscosity measurement of Pluronic, PH, and PHF. (D) Viscosity results enlarged in narrow temperature range (20~24°C).

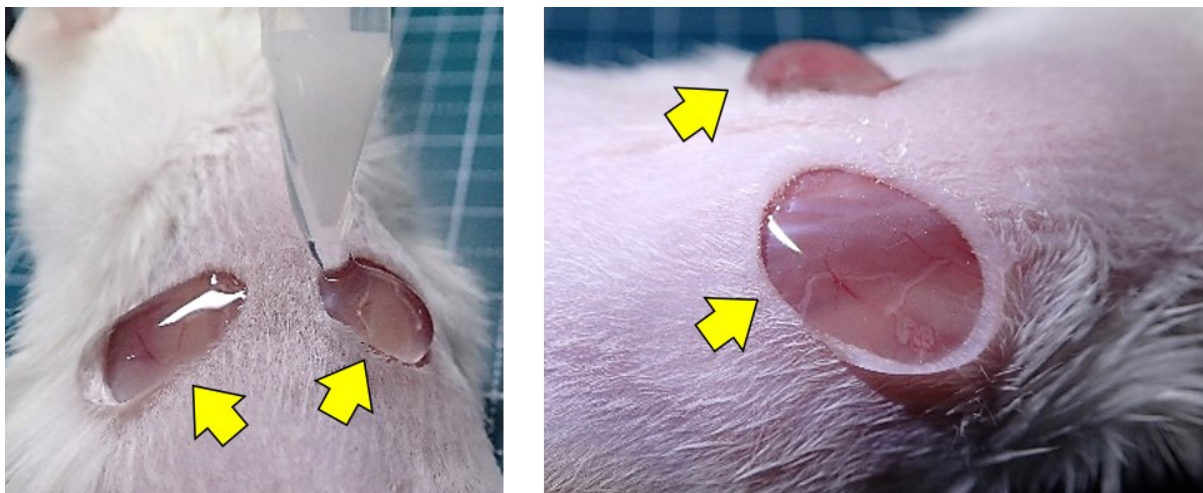

**Figure S4. Transplantation of the ECM hydrogel to the wound site *in vivo*.** Yellow arrows indicate the ECM hydrogels.

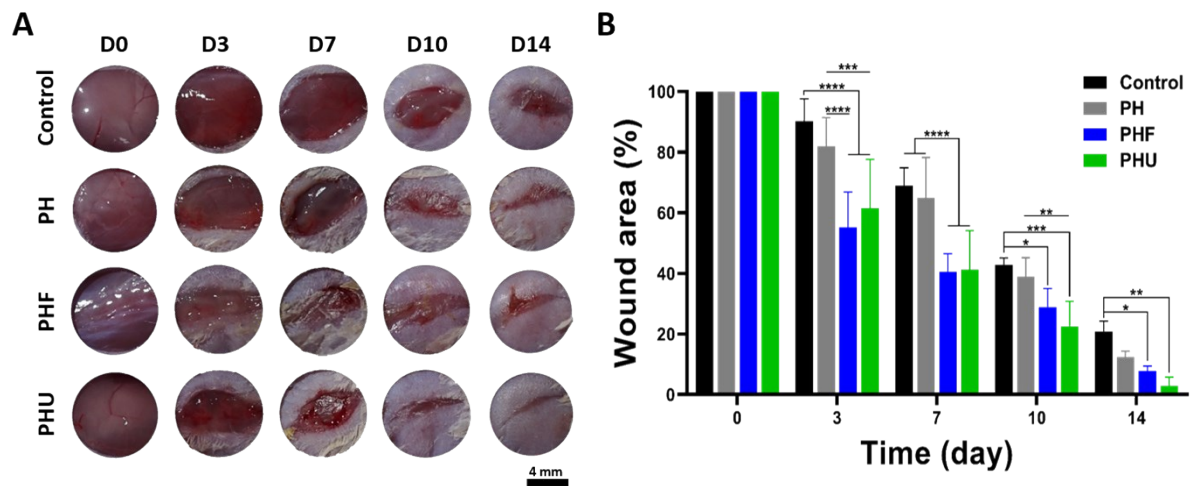

**Figure S5. Observation of full-thickness skin wound closure with time.** (A) Representative images of wound closure with four test groups (control, PH, PHF, PHU) on day 3, 7, 10, and 14 post-surgery. (B) Measurement of wound area size (%) at specific time points for up to 14 days. Statistically significant difference (\* $p < 0.05$ , \*\* $p < 0.01$ , \*\*\* $p < 0.001$ , \*\*\*\* $p < 0.0001$ ).
